# Supplementary material
Source: PubMed Central journal article supplement (PMC3294843)
Supplement: supp_194.6.1378_FigS1-S4_TableS1.pdf [file supp_194.6.1378_FigS1-S4_TableS1.pdf]

# Kinetics of RapA inhibition by PhrA pentapeptide – curve fits –

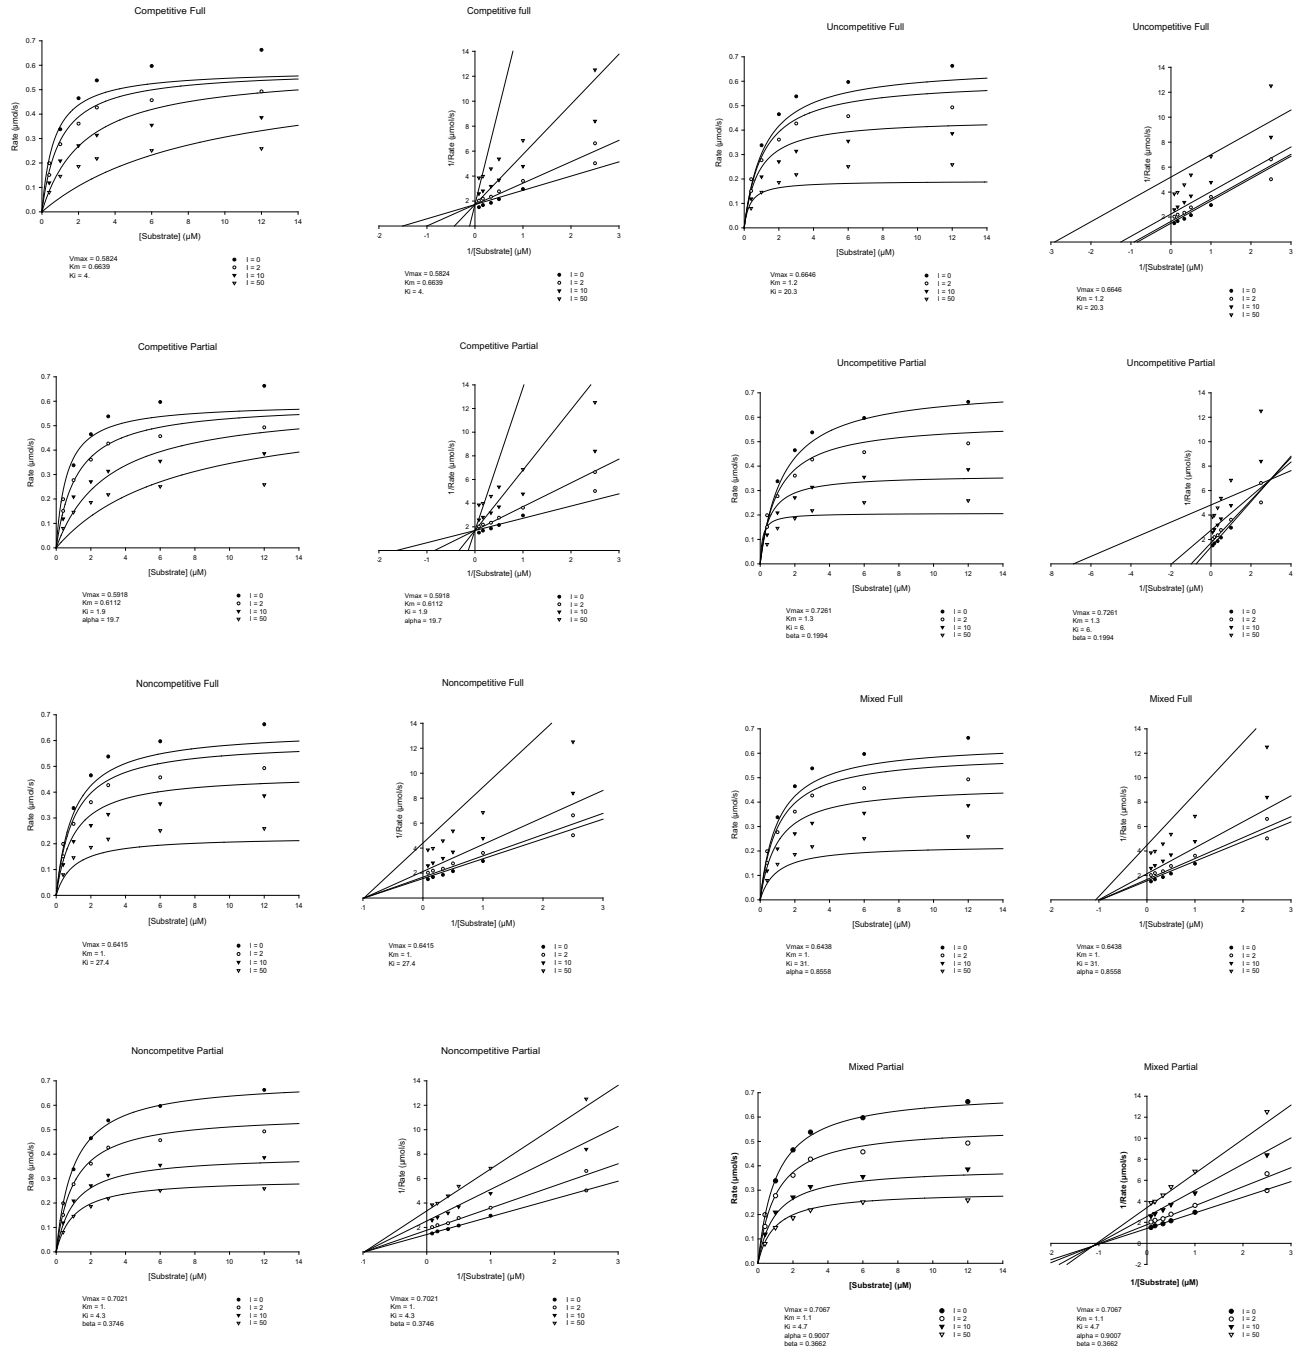

**Fig. S1**

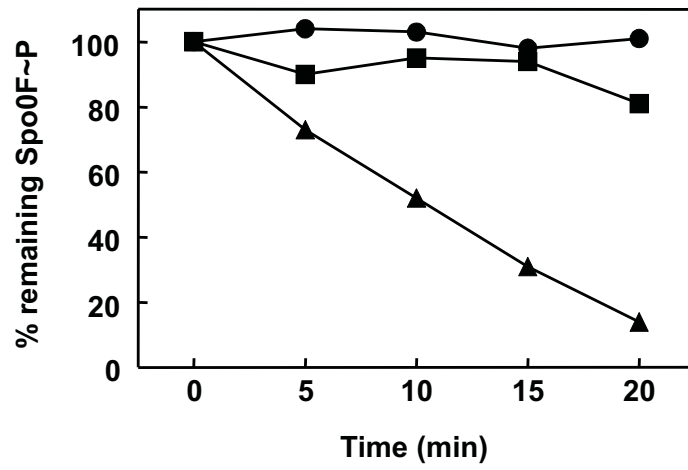

Fig. S2

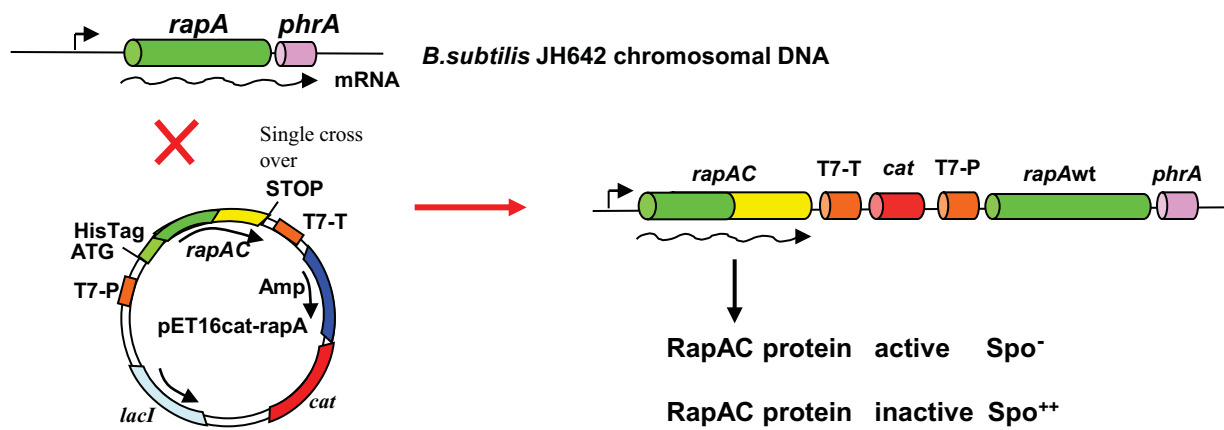

Fig.S3

|                                                                                        |      |                          |         |
|----------------------------------------------------------------------------------------|------|--------------------------|---------|
| 133-SDDIEKAEFAFKMA <b>AEI</b> FYN.LK.QTYV <b>SMSYAVQ</b> ALETYQMYE-173                 | RapA | ] TPR2 ( $\alpha$ 7-8)   |         |
| 131-SD <b>DIEKAEFHFKVAEAYYH</b> .MK.Q <b>THVSMYHILQALDIYQN</b> HHP-171                 | RapH |                          |         |
| 107-YH <b>PEFQQFLQWQYYVAAYV</b> LKKVD <b>YEYCILELKKLLN</b> Q.QLTG-148                  | PlcR |                          |         |
|                                                                                        |      |                          | * *     |
|                                                                                        |      |                          | *       |
| 174-TYTVRRIQCEFVI <b>AGNYDD</b> MQYPER <b>ALPHLELALDLAKKE</b> .GN-215                  | RapA | ] TPR3 ( $\alpha$ 9-10)  |         |
| 172-LY <b>SIRTIQSLFVIAGNYDDF</b> KHYDK <b>ALPHLEAALELAMDI</b> .QN-213                  | RapH |                          |         |
| 149-IDVY <b>QONLYIENAIANIYAE</b> NGYL <b>LKKGIDLFEQILKQLEAL</b> HDN-191                | PlcR |                          |         |
| 4-.....VNELKEK <b>GNKALS</b> .VG.NID <b>DALQCYSEAI</b> KLDPHN.-37                      | TPR1 |                          |         |
|                                                                                        |      |                          | * * * * |
|                                                                                        |      |                          | * * *   |
|                                                                                        |      |                          | * * *   |
| 216-PRLISSAL <b>YNLGN</b> CYKMGELQ <b>KA</b> EY <b>FGKSVSICKSE</b> .K -254             | RapA | ] TPR4 ( $\alpha$ 11-12) |         |
| 214- <b>DRFIAISLLNIANSYDRS</b> GD <b>DDMAVEHFQKA</b> AKVSREK.V -252                    | RapH |                          |         |
| 192- <b>EEFDVKVRYNHAKALYLD</b> SR <b>YEESLYQVNKAIEI</b> SCRINS -231                    | PlcR |                          |         |
| 38-.....HVL <b>YSNRSAA</b> YAKKGDYQ <b>KA</b> YED <b>GCKT</b> VDLKPDM.. -71            | TPR1 |                          |         |
|                                                                                        |      |                          | * * * * |
|                                                                                        |      |                          | * * *   |
|                                                                                        |      |                          | * * *   |
|                                                                                        |      |                          | * * *   |
|                                                                                        |      |                          | * * *   |
|                                                                                        |      |                          | * * *   |
| 255-FDNL <b>PH</b> SIYSLTQVLYKQK.NDAEAQKKYREGLEIARQYSDEL-296                           | RapA | ] TPR5 ( $\alpha$ 13-14) |         |
| 253- <b>PDLLPKVLFGLSWTLCKAG</b> .Q <b>TQKAFQFIEEGLDH</b> ITARSHKF-294                  | RapH |                          |         |
| 232-MA <b>LIGQLY</b> QRGECLRK <b>IEYE</b> EAEIEDAYKKAS <b>FFDI</b> LEMHA-274           | PlcR |                          |         |
| 72-..... <b>GK</b> YSR <b>KA</b> AALEFLNR <b>FEEA</b> KRT <b>YEEGL</b> KHEANNPQLKE-105 | TPR1 |                          |         |
|                                                                                        |      |                          | * * *   |
|                                                                                        |      |                          | * * *   |
|                                                                                        |      |                          | * * *   |
|                                                                                        |      |                          | * * *   |
|                                                                                        |      |                          | * * *   |
|                                                                                        |      |                          | * * *   |
| 297-FVELFQFLHALY -308                                                                  | RapA | ] $\alpha$ 15            |         |
| 295- <b>YKELFLFLQAVY</b> -306                                                          | RapH |                          |         |
| 275- <b>YKEALVNKISRI</b> -286                                                          | PlcR |                          |         |
|                                                                                        |      |                          | * * *   |

Fig. S4

1 **Legend to Supplementary Figures**

2

3 **Fig. S1:** Curve fit analysis of inhibition equations fit to the data obtained with RapA and the  
4 PhrA pentapeptide. The SigmaPlot software was used to determine the type of competition that  
5 best fit the data obtained experimentally and plotted as Michaelis-Menten and Lineweaver-Burk  
6 kinetics.

7

8 **Fig. S2:** RapCA1 does not dephosphorylate Spo0F~P. The dephosphorylation assay was carried  
9 out as described in Materials and Methods and samples were taken at the indicated time points.  
10 Spo0F~P (2.5  $\mu$ M) was incubated alone (-●-) with RapAwt (-▲-) or with RapCA1 (-■-) (0.5  
11  $\mu$ M). Percentage of remaining Spo0F~P was calculated from the quantitation (pixel values) of  
12 each time point using the ImageQuant Software.

13

14 **Fig. S3:** Schematic representation of the mechanism of a single cross over integration using  
15 plasmid pET16cat carrying the *rapAC* genes. Integration of these plasmids results in a  
16 duplication of the *rapA* gene and interruption of the *rapA phrA* transcript at the 3' end of the  
17 *rapA* sequence (on the left side of the vector), and *rap* and *phr* genes lacking an active promoter  
18 (on the right side of the vector). If PhrA is not produced and if the Rap protein is active against  
19 Spo0F~P, the cells will be sporulation deficient ( $spo^-$ ). On the contrary, if the Rap protein is  
20 inactive against Spo0F~P, a hypersporulation phenotype ( $spo^{++}$ ) will be observed similar to the  
21 phenotype of the *rapA* deletion mutant (4).

22

1 **Fig. S4:** Amino acid sequence alignment of the TPR domains involved in peptide binding in  
2 RapA, RapH, PlcR and the TPR1 module of the Hop protein that specifically recognizes the C-  
3 terminal heptapeptide of Hsp70 (2,3,5). The purple lines delineate the predicted 34 amino acids  
4 of the TPR domains of RapA based on the position of the consensus residues. TPR consensus  
5 amino acids are in bold in RapA and TPR1 and they occupy position 8, 20 and 27 (small side  
6 chain residues: A, G or S), position 11 (bulky, charged, small hydrophobic residues: Y, F, H, K,  
7 A, L) and position 24 (bulky, hydrophobic residues: Y, F, L or I). Notably, the TPR sequences in  
8 PlcR are degenerated and therefore conservation of the consensus is not always observed (1).  
9 The extent of the  $\alpha$  helices as defined by the crystal structures of RapH and PlcR are indicated  
10 by the red and green boxes, respectively. Residues highlighted in red and the asterisks within the  
11 RapA sequence indicate the amino acids that affect PhrA activity when mutated. Residues  
12 highlighted in green and the asterisks within the PlcR sequence indicate residues relevant for  
13 PlcR-PapR interaction based on the structure of the complex. Residues in orange within the  
14 TPR1 sequence indicate positions critical for peptide binding that correspond to similar residues  
15 in RapA. The TPR number and a helix number for the Rap and PlcR proteins are shown on the  
16 right of the brackets.

## 17 **References**

- 18 1. **Bouillaut, I., s. Perchat, s. Arold, s. Zorrilla, I. Slamti, c. Henry, m. Gohar, n.**  
19 **Declerck, and d. Lereclus.** 2008. Molecular basis for group-specific activation of the  
20 virulence regulator plcR by papr heptapeptides. *Nucleic acids res.* **36**:3791-3801.
- 21 2. **Declerck, n., I. Bouillaut, d. Chaix, n. Rugani, I. Slamti, f. Hoh, d. Lereclus, and s. T.**  
22 **Arold.** 2007. Structure of plcR: insights into virulence regulation and evolution of quorum  
23 sensing in gram-positive bacteria. *Proc.natl.acad.sci.u s.a* **104**:18490-18495.
- 24 3. **Perego, m. And j. A. Brannigan.** 2001. Pentapeptide regulation of aspartyl-phosphate  
25 phosphatases. *Peptides* **22**:1541-1547.

- 1 4. **Perego, m., c. G. Hanstein, k. M. Welsh, t. Djavakhishvili, p. Glaser, and j. A. Hoch.**  
2 1994. Multiple protein aspartate phosphatases provide a mechanism for the integration of  
3 diverse signals in the control of development in *bacillus subtilis*. Cell **79**:1047-1055.
- 4 5. **Scheufler, c., a. Brinker, g. Bourenkov, s. Pegoraro, l. Moroder, h. Bartunik, f. U.**  
5 **Hartl, and i. Moarefi.** 2000. Structure of tpr domain-peptide complexes: critical elements  
6 in the assembly of the hsp70-hsp90 multichaperone machine. Cell **101**:199-210.

7

8

**Table S1: Oligonucleotide primers used in this study**

| Name          | Sequence <sup>a</sup>                             |
|---------------|---------------------------------------------------|
| OM EcoRI SWAP | 5'-AGTGC <u>GAATTC</u> GTCTTTCGGGGTCAACC-3'       |
| OM3' Kpn      | 5'-AAACAGGTACCTTAGATTTC AATTTTCATACAAACCTTCAC-3'  |
| OMexp3'       | 5'-GGCTGGATCCAAACAATAACAACAACCTTAGATTTC-3'        |
| OMexp5'       | 5'-GGTGAACATATGAAGAGTGGGGTAATTCCTTCTTCAGCG-3'     |
| OL5' Bam      | 5'-GGGGGAGGATCCGAGGATGAAGCAGACGATTCCGTC-3'        |
| OL3' Bam      | 5'-AAACCTGGGATCCATTTAGATTTCATATAAACAATCTCC-3'     |
| OM5'Kpn       | 5'-CCCAGGGTACCGTAGAAATCAAGAGTGAAGAAG-3'           |
| RapC BsmA     | 5'-ACCCCCGTCTCGAAATGGCACTGAATGATTTC-3'            |
| RapA BsmA     | 5'-AATCCGTCTCGATTTTCGTTATTGCAGGTAATTATG-3'        |
| RapA 3'Pst    | 5'-CAACACTGCAGACATCCATTTAGATTTCATATAAAC-3'        |
| RapA5'Pst     | 5'-GAGAACTGCAGGTATCTTCAGCCCTTCAATG-3'             |
| RapASOE-70    | 5'-GGCAGAAATAAATTCCCGCTGCTTAAATTCATACATTCCTCG-3'  |
| RapCSOE-70    | 5'-CGAGGAATCTATGAATTTAAGCAGCGGGAATTTATTTCTGCC-3'  |
| RapASOE-122   | 5'-GATAATCCAGCATAAGCTGGTGCCTGAACTCCATTAAG-3'      |
| RapCSOE-122   | 5'-CTTTAATGGAGTTCAGGCACCAGCTTATGCTGGATTATC-3'     |
| RapASOE+105   | 5'-GATCGTCTGTTTCTTTAGCGATTTCCAATCCTTCACGAT-3'     |
| RapCSOE+105   | 5'-ATCGTGAAGGATTGGAAATCGCTAAAGAAACAGACGATG-3'     |
| RapAC5 3'     | 5'-AGGGCTAAATCCTCAATATAAGGATACAG-3'               |
| RapAC5 5'     | 5'-CTGTATCCTTATATTTGAGGATTTAGCCCT-3'              |
| M193A         | 5'-AGGTAATTATGATGATGCGCAGTATCCAGCAAGAGCATTGC-3'   |
| M193Acompl    | 5'-GCAATGCTCTTTCTGGATACTGCGCATCATCATAATTACCT-3'   |
| Q194A         | 5'-TAATTATGATGATATGGCGTATCCAGAAAGAGCATTGCC-3'     |
| Q194Acompl    | 5'-GGCAATGCTCTTTCTGGATACGCCATATCATCATAATTA-3'     |
| Y224A         | 5'-ATCAGTTCTGCCCTAGCGAATCTCGGAAACTGCTATGAG-3'     |
| Y224Acompl    | 5'-CTCATAGCAGTTTCCGAGATTCGCTAGGGCAGGACTGAT-3'     |
| N225A         | 5'-AGTTCTGCCCTATATGCGCTCGGAAACTGCTATGAGAAAATGG-3' |
| N225Acompl    | 5'-CCATTTTCTCATAGCAGTTTCCGAGCGCATATAGGGCAGAACT-3' |
| N228A         | 5'-TATATAATCTCGGAGCGTGCTATGAGAAAATGGGTGAACTGC-3'  |
| N228Acompl    | 5'-GCAGTTCACCCATTTTCTCATAGCACGCTCCGAGATTATATA-3'  |
| K232AF        | 5'-AAACTGCTATGAGGCGATGGGTGAACTGCAAAGG-3'          |
| K232AR        | 5'-CCTTTTGCAGTTCACCCATCGCCTCATAGCAGTTT-3'         |
| E253AF        | 5'-TTCTATTTGCAAGTCGGCGAAGTTCGATAATCTTCCGC-3'      |
| E253AR        | 5'-GCGGAAGATTATCGAACTTCGCCGACTTGCAAATAGAA-3'      |
| H260AF        | 5'-AAGTTCGATAAYCTTCCGGCGTCTATCTACTCTTTAACACAAG-3' |
| H260AR        | 5'-CTTGTGTTAAAGAGTAGATAGACGCCGGAAGATTATCGAACTT-3' |

a) Restriction enzyme sites are underlined.
